# Supplementary material
Source: PubMed Central journal article supplement (PMC3746540)
Supplement: NIHMS499986-supplement-01.pdf [file NIHMS499986-supplement-01.pdf]

**SUPPLEMENTAL MATERIAL**

**Supplementary Table 1**

| <b>Pt ID</b>         | <b>Age</b> | <b>LA size*<br/>/mm<br/>(Bedside)</b> | <b>LA size*<br/>/mm (Intra<br/>Cardiac)</b> | <b>LVEF, %</b> | <b>AF type</b> | <b>Prior<br/>Ablation</b> |
|----------------------|------------|---------------------------------------|---------------------------------------------|----------------|----------------|---------------------------|
| <b>Paroxysmal AF</b> |            |                                       |                                             |                |                |                           |
| PAF1                 | 56         | 41                                    | 45                                          | 79             | PAF            | None                      |
| PAF2                 | 81         | 47                                    | 55                                          | 68             | PAF            | None                      |
| PAF3                 | 61         | 45                                    | 52                                          | 67             | PAF            | None                      |
| PAF4                 | 54         | 42                                    | 45                                          | 73             | PAF            | None                      |
| PAF5                 | 43         | 39                                    | 48                                          | 62             | PAF            | None                      |
| PAF6                 | 51         | 39                                    | 39                                          | 65             | PAF            | None                      |
| PAF7                 | 49         | 38                                    | 38                                          | 65             | PAF            | None                      |
| <b>Mean±SD</b>       | 56±12      | 42±3                                  | 46±6                                        | 68±6           |                |                           |
| <b>Median (IQR)</b>  | 54 (49,61) | 41 (39,45)                            | 45 (39,52)                                  | 67 (65,73)     |                |                           |
| <b>Persistent AF</b> |            |                                       |                                             |                |                |                           |
| PeAF1                | 54         | 55                                    | 55                                          | 45             | PeAF           | PVI+Roof                  |
| PeAF2                | 47         | 45                                    | 55                                          | 45             | PeAF           | PVI+Roof                  |
| PeAF3                | 68         | 43                                    | 63                                          | 63             | PeAF           | PVI+Roof                  |
| PeAF4                | 78         | 47                                    | 65                                          | 53             | PeAF           | PVI+Roof                  |
| PeAF5                | 82         | 43                                    | 66                                          | 67             | PeAF           | PVI+Roof                  |
| PeAF6                | 73         | 50                                    | 50                                          | 60             | PeAF           | None                      |
| PeAF7                | 65         | 50                                    | 50                                          | 49             | PeAF           | PVI+Roof                  |
| PeAF8                | 64         | 41                                    | 55                                          | 29             | PeAF           | PVI+Roof                  |
| PeAF9                | 67         | 40                                    | 56                                          | 68             | PeAF           | PVI+Roof                  |
| PeAF10               | 74         | 60                                    | 60                                          | 65             | PeAF           | None                      |
| PeAF11               | 64         | 40                                    | 50                                          | 27             | PeAF           | PVI+Roof                  |
| PeAF12               | 67         | 48                                    | 48                                          | 66             | PeAF           | None                      |
| PeAF13               | 63         | 54                                    | 54                                          | 56             | PeAF           | PVI+Roof                  |
| PeAF14               | 58         | 55                                    | 55                                          | 50             | PeAF           | None                      |
| PeAF15               | 52         | 50                                    | 55                                          | 42             | PeAF           | PVI+Roof                  |

|                                   |            |            |            |            |        |          |
|-----------------------------------|------------|------------|------------|------------|--------|----------|
| PeAF16                            | 47         | 45         | 54         | 72         | PeAF   | None     |
| PeAF17                            | 60         | 48         | 55         | 50         | PeAF   | None     |
| PeAF18                            | 61         | 56         | 56         | 20         | PeAF   | None     |
| PeAF19                            | 70         | 57         | 57         | 61         | PeAF   | PVI+Roof |
| PeAF20                            | 66         | 62         | 62         | 60         | PeAF   | PVI+Roof |
| PeAF21                            | 72         | 44         | 64         | 37         | PeAF   | None     |
| PeAF22                            | 49         | 45         | 53         | 45         | PeAF   | PVI+Roof |
| PeAF23                            | 64         | 42         | 52         | 65         | PeAF   | None     |
| PeAF24                            | 63         | 45         | 55         | 35         | PeAF   | None     |
| PeAF25                            | 62         | 60         | 60         | 36         | PeAF   | None     |
| <b>Mean±SD</b>                    | 63±9       | 50±7       | 57±6       | 51±14      |        |          |
| <b>Median (IQR)</b>               | 64 (59,69) | 48 (43,55) | 55 (53,60) | 50 (39,64) |        |          |
| <b>Longstanding Persistent AF</b> |            |            |            |            |        |          |
| LSPeAF1                           | 64         | 57         | 57         | 55         | LSPeAF | None     |
| LSPeAF2                           | 64         | 68         | 68         | 33         | LSPeAF | PVI+Roof |
| LSPeAF3                           | 53         | 50         | 55         | 32         | LSPeAF | None     |
| LSPeAF4                           | 66         | 45         | 72         | 59         | LSPeAF | None     |
| <b>Mean±SD</b>                    | 63±7       | 50±6       | 57±6       | 45±14      |        |          |
| <b>Median</b>                     | 62 (58,65) | 55 (47,63) | 63 (56,70) | 45 (32,57) |        |          |

\* Left atrial diameter from the preprocedural referral echocardiogram (as reported in the CONFIRM trial)<sup>1</sup>, and the often larger left atrial diameters measured by intra-procedural imaging. PVI=pulmonary vein isolation; “Roof” is left atrial roof line ablation. PAF = Paroxysmal AF; PeAF = Persistent AF; LSPeAF = Longstanding Persistent AF.

**Supplementary Table 2**

| Pt ID                | Primary Source                                                                                       | Impact of FIRM at Primary Source | Endpoint of FIRM          | Time to Term /mins | CFAE >180° |
|----------------------|------------------------------------------------------------------------------------------------------|----------------------------------|---------------------------|--------------------|------------|
| <i>Paroxysmal AF</i> |                                                                                                      |                                  |                           |                    |            |
| PAF1                 | LA Focal                                                                                             | AF Termination/ non-reinducible  | Sinus                     | 3.1                | 1          |
| PAF2                 | LA Rotor                                                                                             | AF Termination/ non-reinducible  | Sinus                     | 1                  | 0          |
| PAF3                 | LA Rotor                                                                                             | AF Termination/ non-reinducible  | Sinus                     | 12.8               | 0          |
| PAF4                 | LA Rotor                                                                                             | AF Termination/ non-reinducible  | Sinus                     | 2                  | 0          |
| PAF5                 | LA Focal                                                                                             | AF Termination/ non-reinducible  | CTI Flutter               | 3.0                | 1          |
| PAF6                 | LA Focal                                                                                             | AF Termination/ non-reinducible  | Sinus                     | 1                  | 0          |
| PAF7                 | RA Rotor                                                                                             | AF Termination/ non-reinducible  | Sinus                     | 4.1                | 0          |
| <i>Persistent AF</i> |                                                                                                      |                                  |                           |                    |            |
| PeAF1                | LA Rotor                                                                                             | AF Termination/ non-reinducible  | Sinus                     | 1                  | 0          |
| PeAF2                | RA Rotor                                                                                             | AF Termination/ non-reinducible  | Sinus                     | 2.9                | 0          |
| PeAF3                | LA Rotor                                                                                             | AF Slowing                       | 12.6%                     |                    | 0          |
| PeAF4                | LA Focal                                                                                             | AF Slowing                       | 25.9%                     |                    | 1          |
| PeAF5                | No source detected with older system (detectable with new RhythmView™ software but not reclassified) |                                  |                           |                    |            |
| PeAF6                | Unclear                                                                                              | No Acute Endpoint                |                           |                    |            |
| PeAF7                | LA Focal                                                                                             | AF Slowing                       | 20.7%                     |                    | 1          |
| PeAF8                | LA Focal                                                                                             | AF Termination/ non-reinducible  | Left Atrial AT            | 26.8               | 0          |
| PeAF9                | Unclear                                                                                              | No Acute Endpoint                |                           |                    |            |
| PeAF10               | LA Rotor                                                                                             | AF slowing                       | 17.4%                     |                    | 1          |
| PeAF11               | LA Focal                                                                                             | AF Termination/ non-reinducible  | LA AT (Sinus 5 min later) | 1                  | 0          |
| PeAF12               | LA Rotor                                                                                             | AF Termination/ non-reinducible  | Sinus                     | 12                 | 0          |

|                                          |          |                                 |                                       |     |   |
|------------------------------------------|----------|---------------------------------|---------------------------------------|-----|---|
| PeAF13                                   | LA Rotor | AF Slowing                      | 23.5%                                 |     | 0 |
| PeAF14                                   | RA Rotor | AF Termination/ non-reinducible | Sinus                                 | 2.5 | 1 |
| PeAF15                                   | LA Focal | AF Termination/ non-reinducible | Sinus                                 | 2.5 | 1 |
| PeAF16                                   | LA Rotor | AF Termination/ non-reinducible | Sinus                                 | 2.5 | 0 |
| PeAF17                                   | LA Rotor | AF Termination/ non-reinducible | CTI Flutter                           | 1.7 | 1 |
| PeAF18                                   | Unclear  | No Acute Endpoint               |                                       |     |   |
| PeAF19                                   | LA Rotor | AF slowing                      | 12.2%                                 |     | 1 |
| PeAF20                                   | RA Rotor | AF Termination/ non-reinducible | Sinus                                 | 0.8 | 0 |
| PeAF21                                   | Unclear  | No Acute Endpoint               |                                       |     |   |
| PeAF22                                   | LA Rotor | AF Termination/ non-reinducible | Sinus                                 | 3.1 | 0 |
| PeAF23                                   | LA Focal | AF Termination/ non-reinducible | Sinus                                 | 1   | 0 |
| PeAF24                                   | LA Rotor | AF slowing                      | 10.4%                                 |     | 1 |
| PeAF25                                   | LA Rotor | AF slowing                      | 28.4%                                 |     | 1 |
| <b><i>Longstanding Persistent AF</i></b> |          |                                 |                                       |     |   |
| LSPeAF1                                  | LA Rotor | AF Slowing                      | 19.1%                                 |     | 1 |
| LSPeAF2                                  | RA Rotor | AF slowing                      | 28.2%                                 |     | 0 |
| LSPeAF3                                  | LA Rotor | AF Termination/ non-reinducible | Sinus                                 | 1   | 0 |
| LSPeAF4                                  | LA Rotor | AF slowing                      | 12.2% Then, term to LA AT 5 min later |     | 1 |

CTI = Right atrial cavotricuspid isthmus; LA AT = Left atrial tachycardia; LTFU = Lost to Follow-up

**Supplementary Table 3. Spatial Distribution of CFAE Relative to AF Sources**

| Characteristic                                         | Persistent AF    | Paroxysmal AF    | P    |
|--------------------------------------------------------|------------------|------------------|------|
| <i>AF Source vs CFAE Overlap</i>                       |                  |                  |      |
| CFAE Overlap ( $\geq 7$ ) with Source, cm <sup>2</sup> | 0 (0, 0.27)      | 0 (0, 0.77)      | 0.68 |
| (% of source area)                                     | 0 (0, 4)         | 0 (0,44)         | 0.68 |
| Source Overlap with CFAE cm <sup>2</sup>               | 1.5 (0.01, 6.78) | 4.5 (0.27, 8.99) | 0.24 |
| (% of CFAE $\geq 7$ area)                              | 0 (0, 13)        | 0 (0, 7)         | 0.88 |
| <i>AF Source Surrounded by CFAE</i>                    |                  |                  |      |
| <i>(&gt;180°)</i>                                      |                  |                  |      |
| Yes/No                                                 | 11/13            | 2/5              | 0.67 |

**References:**

1. Narayan SM, Krummen DE, Shivkumar K, Clopton P, Rappel W-J, Miller JM. Treatment of atrial fibrillation by the ablation of localized sources: The conventional ablation for atrial fibrillation with or without focal impulse and rotor modulation (confirm) trial. *J Am Coll Cardiol.* 2012;60:628-636
